# Supplementary material for: Eignung und Zulassung von Bewerber_innen auf ein Hochschulstudium
Source: Atypon-hosted journal article supplement (doi:10.1026/0012-1924/a000266), 2021-04-01
Supplement: 0012-1924_a000266_esm1.pdf [file 0012-1924_a000266_esm1.pdf]

## ESM 1. Staatsvertrag über die Hochschulzulassung

Das beschriebene Auswahlverfahren basiert auf denjenigen Rahmenbedingungen, die vom Staatsvertrag über die Hochschulzulassung der Bundesrepublik Deutschland rechtlich vorgegeben werden. Zur inhaltlichen Einordnung des Verfahrens ist im Folgenden ein wortwörtlicher Auszug aus dem aktuell gültigen Staatsvertrag über die Hochschulzulassung (exemplarisch in der Version als Gesetz des Landes Baden-Württemberg) gegeben.

(Zitiert nach: [https://www.landtag-bw.de/files/live/sites/LTBW/files/dokumente/WP16/Drucksachen/7000/16\\_7019\\_D.pdf](https://www.landtag-bw.de/files/live/sites/LTBW/files/dokumente/WP16/Drucksachen/7000/16_7019_D.pdf); Abruf am 31.05.2020)

### Artikel 9

#### Vorabquoten

(1) <sup>1</sup>In einem Auswahlverfahren sind bis zu 20 Prozent der zur Verfügung stehenden Studienplätze vorzubehalten für:

1. Bewerberinnen und Bewerber, für die die Ablehnung des Zulassungsantrages eine außergewöhnliche Härte bedeuten würde,
2. Bewerberinnen und Bewerber, die sich aufgrund entsprechender Vorschriften verpflichtet haben, ihren Beruf in Bereichen besonderen öffentlichen Bedarfs auszuüben,
3. ausländische Staatsangehörige und Staatenlose, soweit sie nicht Deutschen gleichgestellt sind,
4. Bewerberinnen und Bewerber, die bereits ein Studium in einem anderen Studiengang abgeschlossen haben (Bewerberinnen und Bewerber für ein Zweitstudium).

<sup>2</sup>Ferner kann nach Maßgabe des Landesrechts im Rahmen der Kapazität nach Satz 1 eine Quote für in der beruflichen Bildung Qualifizierte, die über keine sonstige Studienberechtigung verfügen, vorgesehen werden; wird die Quote nicht gebildet, erfolgt eine Beteiligung am Verfahren nach Artikel 10.

(2) <sup>1</sup>Die Quoten nach Absatz 1 werden für die Studienplätze je Studienort gebildet; je gebildeter Quote ist mindestens ein Studienplatz zur Verfügung zu stellen. <sup>2</sup>Daneben kann bestimmt werden, dass der Anteil der Studienplätze für die Bewerbergruppen nach Absatz 1 Satz 1 Nummer 4 und Satz 2 an der Gesamtzahl der Studienplätze je Bewerbergruppe nicht größer sein darf als der Anteil der jeweiligen Bewerbergruppe an der Bewerbergesamtzahl. <sup>3</sup>Nicht in Anspruch genommene Studienplätze aus den Quoten nach Absatz 1 werden nach Artikel 10 Absatz 1 vergeben.

(3) Eine außergewöhnliche Härte liegt vor, wenn besondere, vor allem soziale und familiäre Gründe in der Person der Bewerberin oder des Bewerbers die sofortige Aufnahme des Studiums zwingend erfordern.

(4) Bewerberinnen und Bewerber nach Absatz 1 Satz 1 Nummer 4 werden nach den Prüfungsergebnissen des Erststudiums und nach den für die Bewerbung für ein weiteres Studium maßgeblichen Gründen ausgewählt.

(5) Bewerberinnen und Bewerber nach Absatz 1 Satz 2 werden nach Maßgabe des Landesrechts nach dem Grad der Eignung für den gewählten Studiengang und die sich typischerweise anschließenden Berufstätigkeiten ausgewählt.

(6) Wer den Quoten nach Absatz 1 Satz 1 Nummern 2 bis 4 und Satz 2 unterfällt, kann nicht im Verfahren nach Artikel 10 zugelassen werden; Absatz 1 Satz 2 Halbsatz 2 bleibt unberührt.

(7) <sup>1</sup>Besteht in den Fällen des Absatzes 1 Satz 1 Nummern 1, 2 und 4 sowie Satz 2 Rangleichheit, wird vorrangig ausgewählt, wer dem Personenkreis nach Artikel 8 Absatz 3 Satz 1 angehört; im Falle des Absatzes 1 Satz 2 können durch Rechtsverordnung nach Artikel 12 weitere Kriterien vorgesehen werden. <sup>2</sup>Besteht danach noch Rangleichheit, entscheidet das Los.

### Artikel 10

#### Hauptquoten

(1) <sup>1</sup>Im Auswahlverfahren werden die nach Abzug der Studienplätze nach Artikel 8 Absatz 3 Satz 2 und Artikel 9 verbleibenden Studienplätze an jeder Hochschule nach folgenden Grundsätzen vergeben:

1. zu 30 Prozent durch die Stiftung nach dem Ergebnis der Hochschulzugangsberechtigung,
2. zu 10 Prozent durch die Hochschulen nach dem Ergebnis eines Auswahlverfahrens nach Absatz 2,
3. im Übrigen von den Hochschulen nach dem Ergebnis eines Auswahlverfahrens nach Absatz 3.

<sup>2</sup>Die Länder tragen dafür Sorge, dass die Abiturdurchschnittsnoten innerhalb eines Landes und im Verhältnis der Länder untereinander hinsichtlich der jeweiligen Anforderungen und Bewertungen annähernd vergleichbar sind. <sup>3</sup>Solange deren annähernde Vergleichbarkeit im Verhältnis der Länder untereinander nicht gewährleistet ist, erfolgt ein entsprechender Ausgleich bei der Auswahl der Bewerberinnen und Bewerber auf Basis von Prozentrangverfahren und unter Bildung von Landesquoten. <sup>4</sup>Die Quote eines Landes bemisst sich zu einem Drittel nach seinem Anteil an der Gesamtzahl der Bewerberinnen und Bewerber für die nach Artikel 7 einbezogenen Studiengänge (Bewerberanteil) und zu zwei Dritteln nach seinem Anteil an der Gesamtzahl der Achtzehn- bis unter Einundzwanzigjährigen (Bevölkerungsanteil); für die Länder Berlin, Bremen und Hamburg werden die sich danach ergebenden Quoten um dreißig Prozent erhöht. <sup>5</sup>Bei der Berechnung des Bewerberanteils werden nur Personen berücksichtigt, die eine Hochschulzugangsberechtigung besitzen, die von allen Ländern gegenseitig anerkannt ist.

(2) <sup>1</sup>In der Quote nach Absatz 1 Satz 1 Nummer 2 vergibt die jeweilige Hochschule die Studienplätze nach Maßgabe des Landesrechts insbesondere

1. nach dem Ergebnis eines fachspezifischen Studieneignungstests,
2. nach dem Ergebnis eines Gesprächs oder anderer mündlicher Verfahren, die von der Hochschule mit den Bewerberinnen und Bewerbern durchgeführt werden, um Aufschluss über deren Eignung für das gewählte Studium und den angestrebten Beruf zu erhalten,

3. nach der Art einer abgeschlossenen Berufsausbildung oder Berufstätigkeit in einem anerkannten Ausbildungsberuf, die über die fachspezifische Eignung Auskunft gibt,
4. nach besonderen Vorbildungen, praktischen Tätigkeiten, außerschulischen Leistungen oder außerschulischen Qualifikationen, die über die fachspezifische Eignung Auskunft geben.

Das Ergebnis der Hochschulzugangsberechtigung und deren Einzelnoten werden nicht berücksichtigt. Durch Landesrecht kann der Kriterienkatalog nach Satz 1 eingeschränkt werden.

(3) In der Quote nach Absatz 1 Satz 1 Nummer 3 vergibt die jeweilige Hochschule die Studienplätze nach Maßgabe des jeweiligen Landesrechts insbesondere

1. nach folgenden Kriterien der Hochschulzugangsberechtigung:
  - a. Ergebnis der Hochschulzugangsberechtigung für das gewählte Studium (Note und Punkte),
  - b. gewichtete Einzelnoten der Hochschulzugangsberechtigung, die über die fachspezifische Eignung Auskunft geben;
2. nach folgenden Kriterien außerhalb der Hochschulzugangsberechtigung:
  - a. Ergebnis eines fachspezifischen Studieneignungstests,
  - b. Ergebnis eines Gesprächs oder anderer mündlicher Verfahren, die von der Hochschule mit den Bewerberinnen und Bewerbern durchgeführt werden, um Aufschluss über deren Eignung für das gewählte Studium und den angestrebten Beruf zu erhalten,
  - c. Art einer abgeschlossenen Berufsausbildung oder Berufstätigkeit in einem anerkannten Ausbildungsberuf, die über die fachspezifische Eignung Auskunft gibt,
  - d. besondere Vorbildungen, praktische Tätigkeiten, außerschulische Leistungen oder außerschulische Qualifikationen, die über die fachspezifische Eignung Auskunft geben.

In die Auswahlentscheidung ist neben dem Ergebnis der Hochschulzugangsberechtigung nach Satz 1 Nummer 1 mindestens ein schulnotenunabhängiges Kriterium einzubeziehen; im Studiengang Medizin ist zusätzlich mindestens ein weiteres schulnotenunabhängiges Kriterium zu berücksichtigen. Mindestens ein schulnotenunabhängiges Kriterium ist erheblich zu gewichten. In die Auswahlentscheidung fließt mindestens ein fachspezifischer Studieneignungstest nach Satz 1 Nummer 2 Buchstabe a ein.

(4) Das jeweilige Landesrecht kann in den Quoten nach Absatz 1 Satz 1 Nummern 2 und 3 Unterquoten zulassen oder festsetzen. Im Umfang von bis zu 15 Prozent der Quote nach Absatz 1 Satz 1 Nummer 3 kann das Landesrecht abweichend von Absatz 3 Sätze 2 bis 4 zulassen oder festsetzen, dass in einer Unterquote nach Satz 1 ein Kriterium oder mehrere Kriterien ausschließlich nach Absatz 3 Satz 1 Nummer 1 oder ausschließlich nach Absatz 3 Satz 1 Nummer 2 verwendet werden.

(5) Die Kriterien nach den Absätzen 2 und 3 sind jeweils in standardisierter, strukturierter und qualitätsgesicherter Weise transparent anzuwenden. Sie müssen in ihrer Gesamtheit eine hinreichende Vorhersagekraft für den Studienerfolg und die sich typischerweise anschließenden Berufstätigkeiten gewährleisten. Wird ein Kriterium als einziges Kriterium verwendet, muss es eine hinreichende Vorhersagekraft für den Studienerfolg und die sich typischerweise anschließenden beruflichen Tätigkeiten haben.

(6) Die Zahl der Teilnehmerinnen und Teilnehmer am Auswahlverfahren nach den Absätzen 2 und 3 kann nach Maßgabe des jeweiligen Landesrechts begrenzt werden; eine Vorauswahl nach dem Grad der Ortspräferenz darf nur für einen hinreichend beschränkten Anteil der nach den Absätzen 2 und 3 zu vergebenden Studienplätze und nur zur Durchführung aufwändiger individualisierter Auswahlverfahren erfolgen.

(7) Besteht in den Fällen des Absatzes 1 Satz 1 Nummer 1 Ranggleichheit, wird vorrangig ausgewählt, wer dem Personenkreis nach Artikel 8 Absatz 3 Satz 1 angehört. Besteht danach noch Ranggleichheit, entscheidet das Los. In den Fällen des Absatzes 1 Satz 1 Nummern 2 und 3 erfolgt eine Regelung durch das jeweilige Landesrecht.

(8) Bei der Entscheidung über die Studienplatzvergabe ist zunächst die Quote nach Absatz 1 Satz 1 Nummer 1, dann die Quote nach Absatz 1 Satz 1 Nummer 2 und danach die Quote nach Absatz 1 Satz 1 Nummer 3 abzuarbeiten. Durch Rechtsverordnung nach Artikel 12 kann für die Quoten nach Absatz 1 Nummern 2 und 3 eine abweichende Reihenfolge festgelegt werden. Bewerberinnen und Bewerber, die in einer der Quoten ein Zulassungsangebot angenommen haben oder eine Zulassung erhalten haben, werden von der Teilnahme an weiteren Verfahren in den übrigen Quoten ausgeschlossen.

(9) Nicht in Anspruch genommene Studienplätze aus den Quoten nach Absatz 1 werden anteilig in den übrigen Quoten des Absatzes 1 vergeben.
