# Supplementary material for: Eignung und Zulassung von Bewerber_innen auf ein Hochschulstudium
Source: Atypon-hosted journal article supplement (doi:10.1026/0012-1924/a000266), 2021-04-01

### ESM 3. Selektionseffekte des Auswahlverfahrens

Mit Blick auf mögliche Selektionseffekte von Schritt 3 des Auswahlverfahrens stellt sich u. a. die Frage nach der Verteilung der teilnehmenden Bewerber\*innen an diesem dritten Schritt im Vergleich zur Verteilung aller zu diesem dritten Schritt eingeladenen Bewerber\*innen. Unten abgebildet sind die entsprechenden Verteilungen in Abhängigkeit von der durch die HZB-Note erreichten Punktzahlen (je höher, desto besser). Es zeigt sich (für dieses exemplarische, jedoch zentrale Kriterium): Die Verteilungen von an Schritt 3 teilnehmenden Bewerber\*innen entspricht im Wesentlichen – natürlich in abgeflachter Form – der Verteilung aller zu Schritt 3 eingeladenen Bewerber\*innen. Ein Selektionseffekt des Verfahrens scheint bzgl. der HZB-Note entsprechend nicht vorzuliegen. Die Verteilung der zum Studium zugelassenen Bewerber\*innen nach Teilnahme an Schritt 3 ist hingegen erwartungskonform leicht rechtslastig (dies entspricht auch der Gewichtung der HZB-Note im Verfahren).

**Diagramm 1 (alle Bewerber\*innen)**

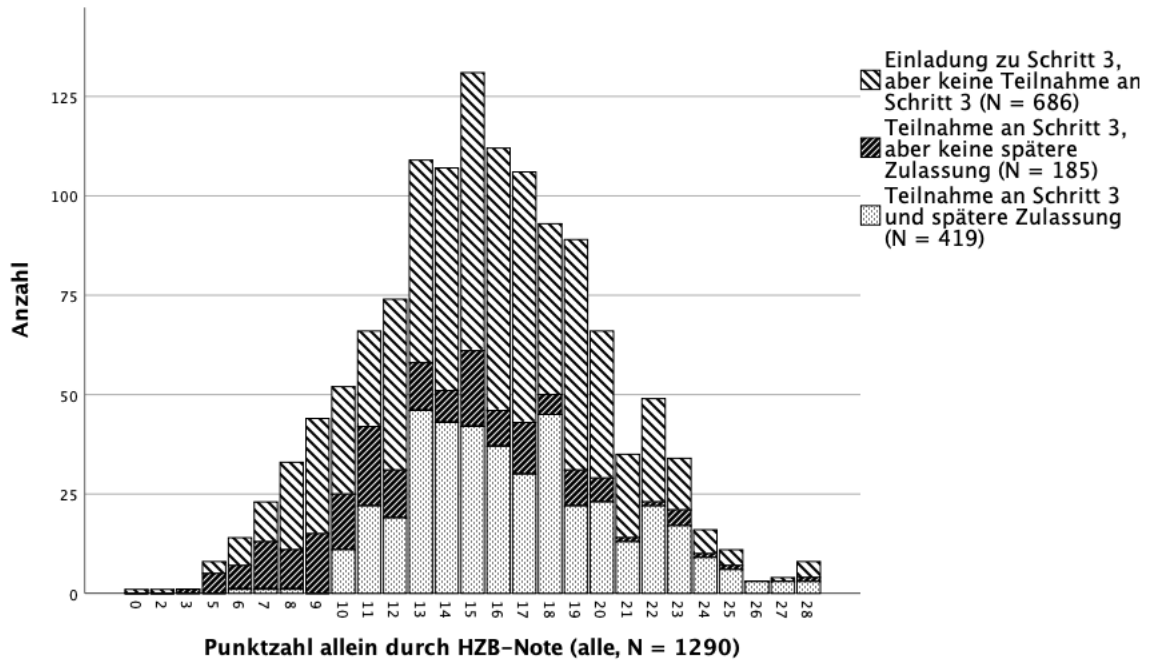

**Diagramm 2 (nur Mathematik)**

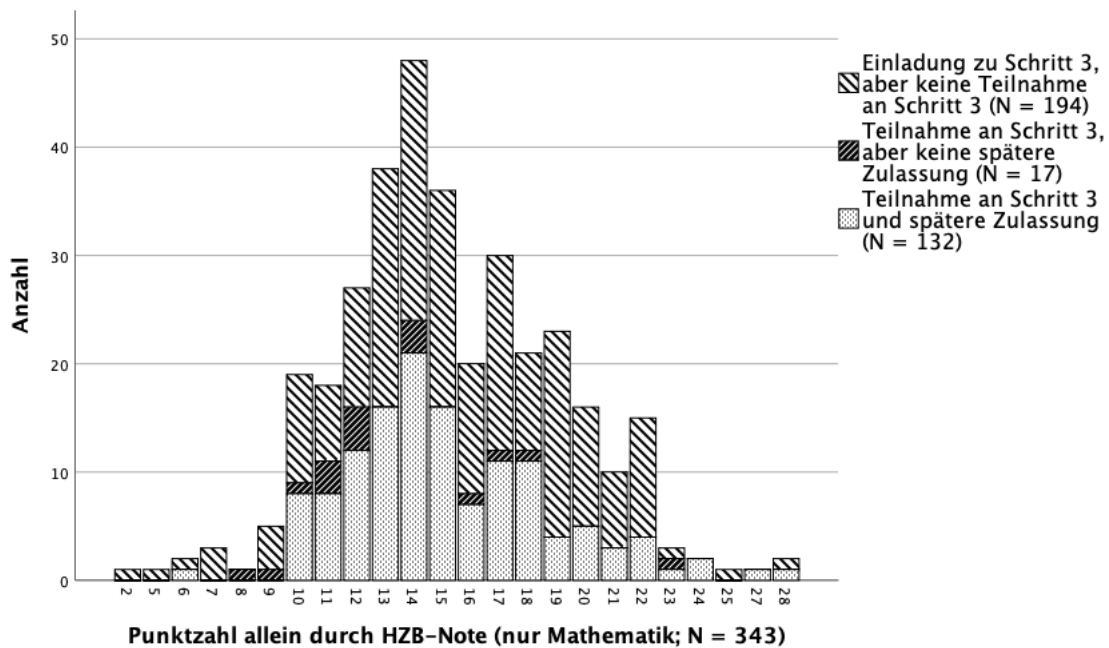

Supplement: 0012-1924_a000266_esm3.pdf [file 0012-1924_a000266_esm3.pdf]
