# Supplementary material for: Eignung und Zulassung von Bewerber_innen auf ein Hochschulstudium
Source: Atypon-hosted journal article supplement (doi:10.1026/0012-1924/a000266), 2021-04-01
Supplement: 0012-1924_a000266_esm4.pdf [file 0012-1924_a000266_esm4.pdf]

#### ESM 4. Außerschulisches Engagement inklusive Bewertungsschema

Im Folgenden ist eine Übersicht über anrechenbares außerschulisches Engagement inklusive des Bewertungsschemas im Rahmen des Auswahlverfahrens in der für den beschriebenen Bewerbungsdurchlauf gültigen Fassung gegeben.

(Zitiert nach: [https://www.leuphana.de/fileadmin/user\\_upload/services/studierendenservice/formulare/Zulas-sung\\_College/UEbersicht\\_Ausserschulische\\_Leistungen.pdf](https://www.leuphana.de/fileadmin/user_upload/services/studierendenservice/formulare/Zulas-sung_College/UEbersicht_Ausserschulische_Leistungen.pdf); zuletzt abgerufen am 09.12.2020)

| Kategorie                                                                                                                                                                                                                                                                                                                                                                                                                                                                                                                                                                                                                                                                                 | max. 5 Punkte                    | Nachweis durch                                                                                    |
|-------------------------------------------------------------------------------------------------------------------------------------------------------------------------------------------------------------------------------------------------------------------------------------------------------------------------------------------------------------------------------------------------------------------------------------------------------------------------------------------------------------------------------------------------------------------------------------------------------------------------------------------------------------------------------------------|----------------------------------|---------------------------------------------------------------------------------------------------|
| 1. freiwilliges soziales, ökologisches oder kulturelles (Halb-) Jahr bzw. mind. ein-(halb-) jähriger geregelter Freiwilligendienst<br>- ab 6 Monate Dauer<br>- ab 10 Monate Dauer<br>Als geregelter Freiwilligendienst werden folgende Programme anerkannt: „weltwärts“-Programm, Community Service Program (CSP), European Voluntary Service (EVS), Anderer Dienst im Ausland (ADiA), "IBVolunteers", „kulturweit“, „Internationaler Jugendfreiwilligendienst“ (IJFD).                                                                                                                                                                                                                   | 1 Punkt<br>2 Punkte              | Bescheinigung der Einsatzstelle/ des Trägers mit Angaben einer Kontaktperson für evtl. Rückfragen |
| 2. mind. <b>einjährige</b> Tätigkeit in der Sekundarstufe I oder II<br>- als Schulsprecher/in oder<br>- im Schulsprecher-Team oder<br>- als Mitglied im Schulvorstand.<br><b>Nicht anerkannt werden</b> können z.B. Tätigkeiten als Klassen- oder Stufen-sprecher                                                                                                                                                                                                                                                                                                                                                                                                                         | 2 Punkte                         | Bescheinigung der Schule oder Vermerk im Zeugnis mit Angabe des Zeitraums                         |
| 3. Tätigkeit als<br>- gewähltes Mitglied in Kommunalparlamenten (z. B. Gemein-derat, Stadtrat, Kreistag) <u>oder</u><br>- gewähltes Landtags- oder Bundestagsmitglied                                                                                                                                                                                                                                                                                                                                                                                                                                                                                                                     | 2 Punkte <u>oder</u><br>3 Punkte | Bescheinigung des Gemeinderats, Stadtrats, Kreistags, Landtags, Bundestags                        |
| 4. mind. viermonatiger Schulbesuch ab Sekundarstufe I oder ein Semester Studium im Ausland                                                                                                                                                                                                                                                                                                                                                                                                                                                                                                                                                                                                | 2 Punkte                         | Bescheinigung der in- oder ausländischen (Hoch-) Schule                                           |
| 5. 1.-3. Einzel- oder Gruppen-Preisträger/innen bei den vom Bund und Ländern gemeinsam geförderten bundesweiten Schüler- und Jugendwettbewerben (z.B. Jugend forscht, Fremdsprachen, Mathematik) ab Sekundarstufe I<br>- Preisträger/innen auf Landesebene <u>oder</u><br>- Preisträger/innen auf Bundesebene<br>Als Wettbewerbe können grundsätzlich die in §2 des Verwaltungs-abkommens v. 4.7.07 (veröffentlicht im Bundesanzeiger Nr. 106 vom 13.6.07 (S. 5861)) genannten Wettbewerbe sowie die nach den von der Kultusministerkonferenz empfohlenen Schülerwettbewerbe (Anlage zu den Qualitätskriterien für Schülerwettbewerbe, Beschluss der KMK vom 17.9.2009) anerkannt werden. | 2 Punkte <u>oder</u><br>3 Punkte | Bescheinigung des Veran-stalters des Wettbe- werbs                                                |
| 6. Studienstipendiaten/innen der Mitglieder der in der „Arbeitsge-meinschaft der Begabtenförderungswerke in der Bundesrepublik Deutschland“ zusammengeschlossenen bundesweit tätigen Be-gabtenförderungswerke, Teilnehmerinnen und Teilnehmer der „Deutschen Schülerakademie“ oder Studienstipendiaten/innen der Stiftung Begabtenförderungswerk Berufliche Bildung oder Stu-dienstipendiaten/innen des DAAD                                                                                                                                                                                                                                                                              | 3 Punkte                         | Bescheinigung der Be-gabtenförderungswerke bzw. Deutschen Schüler-akademie bzw. des DAAD          |
| 7. Einzel- und Gruppen-Preisträger/innen bei Wettkämpfen in olym-pischen Disziplinen auf Landesebene, Bundesebene <u>oder</u> Mitglied in A-, B-, C-Kader in olympischen Disziplinen auf Bundesebene                                                                                                                                                                                                                                                                                                                                                                                                                                                                                      | 2 Punkte                         | Geeigneter Nachweis (z. B. von nationalen Sportver-bänden, Olympiastützpunk-ten)                  |
| 8. besondere Fremdsprachenkenntnisse in einer oder mehreren Fremdsprachen (außer Englisch) auf Ebene C1 des Gemeinsamen Europäischen Referenzrahmens für Sprache (GER), nachzuwei-sen durch ein gültiges Sprachzertifikat eines anerkannten Sprach-instituts, welches die Einordnung nach dem GER enthält                                                                                                                                                                                                                                                                                                                                                                                 | 2 Punkte                         | Siehe Text                                                                                        |
| 9. abgeschlossene Berufsausbildung mit der Note sehr gut bzw. gut                                                                                                                                                                                                                                                                                                                                                                                                                                                                                                                                                                                                                         | 3 Punkte                         | Ausbildungsvertrag und Prüfungszeugnis                                                            |
