# Supplementary material for: Eignung und Zulassung von Bewerber_innen auf ein Hochschulstudium
Source: Atypon-hosted journal article supplement (doi:10.1026/0012-1924/a000266), 2021-04-01
Supplement: 0012-1924_a000266_esm5.pdf [file 0012-1924_a000266_esm5.pdf]

## ESM 5. Beispielitems des allgemeinen Studierfähigkeitstests

---

Im Folgenden sind veröffentlichte Beispielitems des allgemeinen Studierfähigkeitstest für das Auswahlverfahren an der Leuphana Universität Lüneburg zu den drei Testkategorien „Zusammenhänge analysieren“, „Strukturen erkennen“ und „Konzentriert und sorgfältig arbeiten“ gegeben.

(Für weitere Informationen siehe auch: [https://www.leuphana.de/fileadmin/user\\_upload/college/bewerben/bachelor/2015\\_Beispielaufgaben\\_Zulassungstest\\_deutsch.pdf](https://www.leuphana.de/fileadmin/user_upload/college/bewerben/bachelor/2015_Beispielaufgaben_Zulassungstest_deutsch.pdf); zuletzt abgerufen am 09.12.2020)

---

### Testkategorie 1: Zusammenhänge analysieren

## ZUSAMMENHÄNGE ANALYSIEREN

---



### Instruktion:

Mit den folgenden Aufgaben wird Ihre Fähigkeit geprüft, in Diagrammen und Tabellen dargestellte Zusammenhänge richtig zu analysieren und zu interpretieren. Wenn in einer Aufgabe nicht anders angegeben, sind alle Werte linear abgetragen, d. h., gleiche Abstände auf einer Koordinatenachse entsprechen gleichen Differenzen bei den entsprechenden Werten.

Wählen Sie bei jeder Aufgabe unter den mit (A) bis (D) bezeichneten Lösungsvorschlägen die zutreffende Antwort aus, und kreuzen Sie den betreffenden Lösungsbuchstaben an.

Copyright: ITB Consulting GmbH, Bonn

1. Das folgende Diagramm zeigt ein Ergebnis einer Befragung zur PC-Nutzung.

### PC Nutzung nach Altersgruppen und Geschlecht

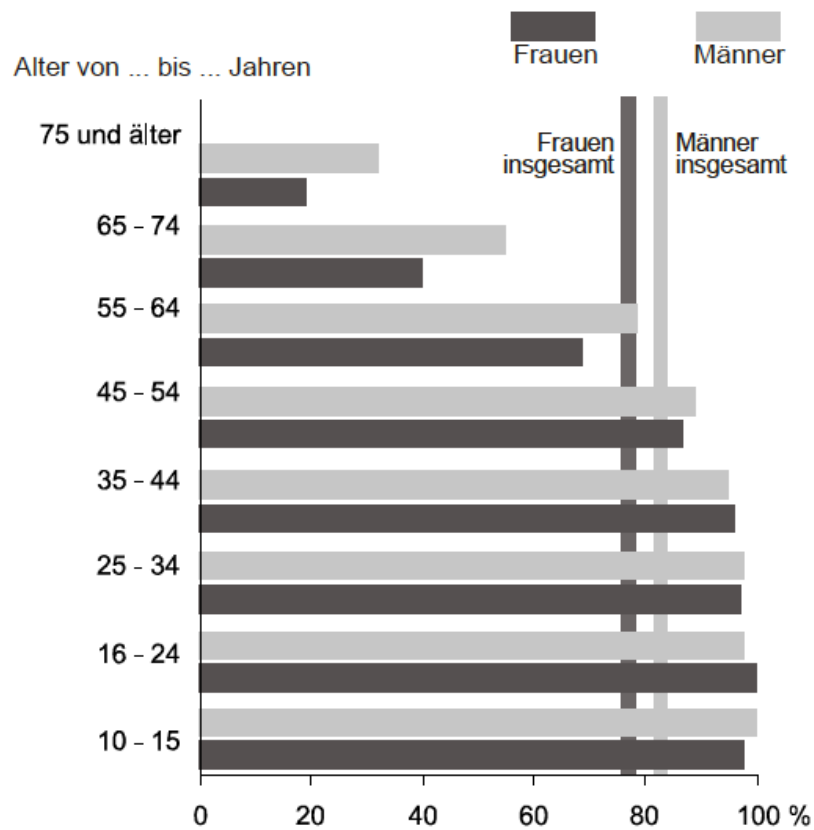

Welche der folgenden Aussagen lässt bzw. lassen sich aus diesen Informationen ableiten?

- I. In allen Altersgruppen gaben die Männer häufiger als die Frauen an, einen PC zu nutzen.
  - II. Ungefähr die Hälfte der befragten Männer waren 55 Jahre oder älter.
- (A) Nur Aussage I lässt sich ableiten.  
 (B) Nur Aussage II lässt sich ableiten.  
 (C) Beide Aussagen lassen sich ableiten.  
 (D) Keine der beiden Aussagen lässt sich ableiten.

2. Die nachstehende Tabelle zeigt, wie sich in einem europäischen Land die Biotechnologie-Branche im letzten Jahr gegenüber dem Vorjahr entwickelt hat.

| <b>Biotechnik-Branche</b><br>Angaben in Mio. Euro |                     |                                        |
|---------------------------------------------------|---------------------|----------------------------------------|
|                                                   | <b>letztes Jahr</b> | <b>Veränderung zum vorletzten Jahr</b> |
| <b>Umsatz</b>                                     | 2 911               | + 11 %                                 |
| <b>Aufwendungen für Forschung u. Entwicklung</b>  | 934                 | - 1 %                                  |
| <b>Netto-Verlust</b>                              | 270                 | - 50 %                                 |
| <b>Zahl der Unternehmen</b>                       | 600                 | + 3 %                                  |
| <b>Beschäftigte</b>                               | 17 200              | + 7 %                                  |

Welche der folgenden Aussagen lässt bzw. lassen sich aus diesen Informationen ableiten?

- I. Die betreffenden Unternehmen hatten im letzten Jahr im Durchschnitt weniger als 40 Beschäftigte.
  - II. Im vorletzten Jahr betrug der Netto-Verlust weniger als 270 Mio. Euro.
- (A) Nur Aussage I lässt sich ableiten.  
 (B) Nur Aussage II lässt sich ableiten.  
 (C) Beide Aussagen lassen sich ableiten.  
 (D) Keine der beiden Aussagen lässt sich ableiten.

3. Die Abbildung zeigt in Fünf- bzw. Zehnjahresschritten für die Bundesrepublik Deutschland den sogenannten Jugendquotienten (JQ) und den Altenquotienten (AQ). Der JQ ist definiert als das Verhältnis der Zahl aller unter 20 Jahre alten (Jugendlichen) zur Zahl aller 20- bis 59jährigen; der AQ ist der Quotient aus der Zahl aller über 59 Jahre alten (Senioren) zur Zahl aller 20- bis 59jährigen. (Ab dem Jahr 2020 handelt es sich um Schätzungen.)

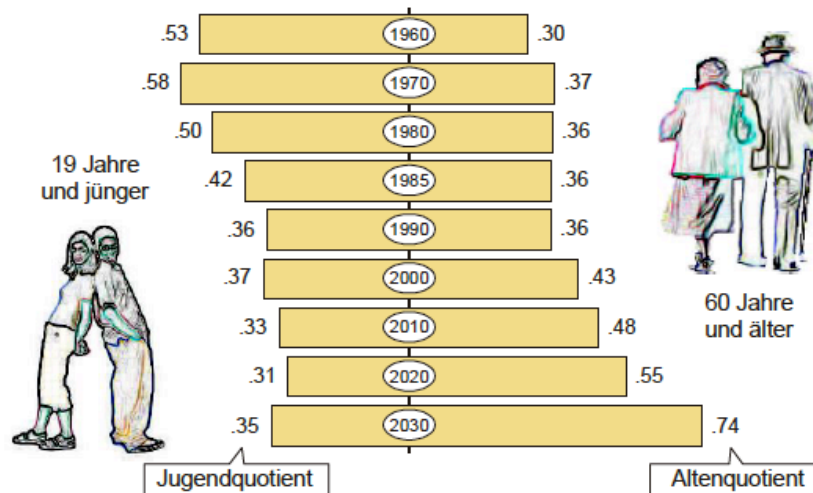

Welche der folgenden Aussagen lässt bzw. lassen sich aus diesen Informationen ableiten?

- I. JQ und AQ können nicht größer als 1 werden.
  - II. Wenn  $JQ = AQ = .50$ , dann gibt es in jeder der drei Altersgruppen (jünger als 20 / 20 bis 59 / älter als 59) gleich viele Personen.
- (A) Nur Aussage I lässt sich ableiten.
  - (B) Nur Aussage II lässt sich ableiten.
  - (C) Beide Aussagen lassen sich ableiten.
  - (D) Keine der beiden Aussagen lässt sich ableiten.

4. In der nachstehenden Graphik ist dargestellt, wie sich im letzten Jahr die gesamten monatlichen Haushaltskosten in einem EU-Land auf die einzelnen Bereiche (z. B. Ernährung, Wohnen und Beheizen) verteilt haben. Dabei sind jeweils der Pro-Kopf-Durchschnittswert für die Haushalte insgesamt (weißer Balken) sowie der Pro-Kopf-Durchschnittswert für die armutsgefährdeten Haushalte (grauer Balken) angegeben.

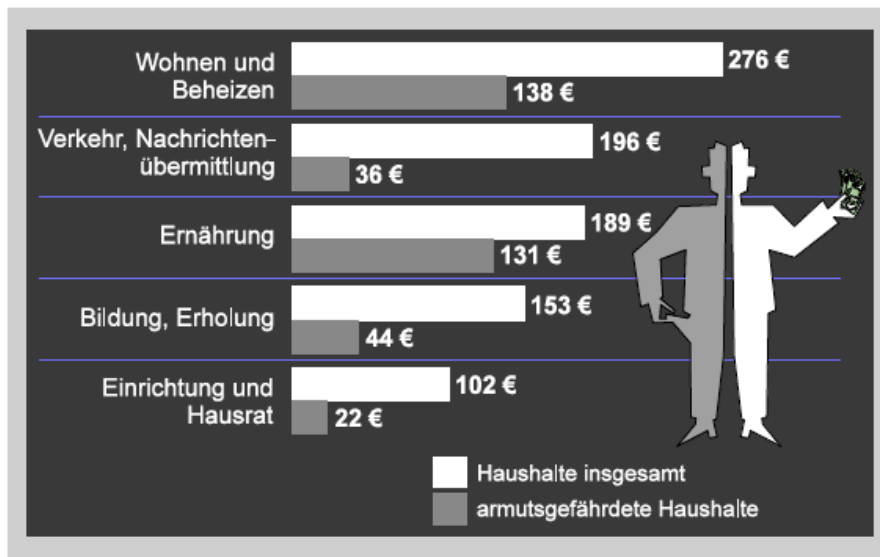

Welche der folgenden Aussagen lässt bzw. lassen sich aus diesen Informationen ableiten?

- I. In den armutsgefährdeten Haushalten entfiel pro Kopf im Durchschnitt ein größerer prozentualer Anteil an den Gesamtausgaben auf die Ernährung als in den Haushalten insgesamt.
  - II. Die nicht armutsgefährdeten Haushalte gaben pro Kopf im Durchschnitt mehr als 276 € für Wohnen und Beheizen aus.
- (A) Nur Aussage I lässt sich ableiten.  
 (B) Nur Aussagen II lässt sich ableiten.  
 (C) Beide Aussagen lassen sich ableiten.  
 (D) Keine der beiden Aussagen lässt sich ableiten.

## STRUKTUREN ERKENNEN

### Instruktion:

In den folgenden Aufgaben werden Ihnen einige Ausdrücke in erfundenen Fremdsprachen und deren deutsche Übersetzung vorgestellt. Daraus können Sie jeweils die Bedeutung einzelner Wörter sowie einige grammatikalische Regeln der fremden Sprache erschließen. Mit Hilfe dieser Informationen können Sie die sich anschließenden Fragen beantworten. Jeweils zwei Aufgaben beziehen sich auf eine bestimmte Sprache. Verwenden Sie daher zur Beantwortung der Fragen jeweils nur die dazu vorgegebenen Ausdrücke.

Sie können davon ausgehen,

- dass es keine Ausnahmen von den Regeln gibt (z. B. unregelmäßige Verben) und
- dass nur diejenigen Regeln gelten, die sich aus den vorgegebenen Ausdrücken erschließen lassen.

### Beispiel:

koloa = ich liege

kolôe = er lag

satoe = er steht

Frage: Was heißt „**ich stand**“ in der fremden Sprache?

- (A) satoa
- (B) kolôa
- (C) satoe
- (D) satôa

Antwort (D) ist richtig, denn:

1. Die Ausdrücke für „ich liege“ und „er lag“ unterscheiden sich nur in den letzten beiden Buchstaben; somit muss „kol“ der Stamm des Verbs „liegen“ sein.
2. Die Ausdrücke für „er lag“ und „er steht“ haben beide als letzten Buchstaben das „e“; folglich bedeutet ein angehängtes „e“ „er“.
3. Die beiden Gegenwartsformen („ich liege“ und „er steht“) haben beide das „o“ als vorletzten Buchstaben; damit muss „ô“ an vorletzter Stelle die Vergangenheitsform anzeigen und ein „a“ an letzter Stelle die Bedeutung „ich“ haben.
4. Daraus folgt: „ich stand“ muss in der fremden Sprache „satôa“ heißen.

**Die Frage 5 bezieht sich auf die Ausdrücke:**

|                         |   |                                 |
|-------------------------|---|---------------------------------|
| rumpulöpp               | = | Das Kind schläft.               |
| renguming tschik löppzi | = | Der Mensch beschützt sein Kind. |
| rumpilemp gum           | = | Die Ziege schläft tief.         |
| yanitzorr lempzi        | = | Der Löwe tötet die Ziege.       |

**5.** „Das Kind beschützt seine Ziege“ heißt in der fremden Sprache:

- (A) rumpulemp tschik rengzi
- (B) rengilöpp tschik lempzi
- (C) rengulöpp tschik lempzi
- (D) rumpilemp tschik löppzi

**Die Frage 6 bezieht sich auf die Ausdrücke:**

|            |   |                   |
|------------|---|-------------------|
| lianvesu   | = | sie haben getanzt |
| tioru      | = | du spielst        |
| satisaoru  | = | du wirst spielen  |
| sajusakune | = | ich werde singen  |
| litivesu   | = | du hast getanzt   |

**6.** „sie werden tanzen“ heißt in der fremden Sprache:

- (A) saansavesu
- (B) saansali
- (C) savesu
- (D) lianlivesu

### Testkategorie 3: Konzentriert und sorgfältig arbeiten

## KONZENTRIERT UND SORGFÄLTIG ARBEITEN

**Bearbeitungszeit für 30 Aufgaben: 7 Minuten**

Mit dieser Aufgabengruppe wird geprüft, wie schnell und wie sorgfältig Sie arbeiten.

In den einzelnen Aufgaben ist jeweils der **Hersteller-Code** (fünfstellig, z.B. DO101) und der **Wirkstoff-Code** (fünfstellig, z.B. H.1107) eines bestimmten Artikels angegeben. Anhand dieser beiden Codes und der nebenstehenden Tabelle sollen Sie dem betreffenden Artikel die richtige **Verträglichkeitsgruppe (A, B, C oder D)** zuweisen. Wie Sie dabei vorzugehen haben, wird anhand der folgenden Beispielaufgabe erläutert.

| Beispiel-aufgabe: | Aufg.-Nr. | Hersteller-Code | Wirkstoff-Code | auf dem Antwortbogen:                                                                                                    |
|-------------------|-----------|-----------------|----------------|--------------------------------------------------------------------------------------------------------------------------|
|                   | 7.        | QD011           | F.1101         | 7 <input type="checkbox"/> A <input checked="" type="checkbox"/> B <input type="checkbox"/> C <input type="checkbox"/> D |

Bei **Aufgabe A7** lautet der Hersteller-Code des Artikels QD011. Suchen Sie also in der Tabelle zunächst diejenige **Spalte**, über der dieser Code steht. Gehen Sie dann in dieser Spalte nach unten bis zu der **Zeile**, in der links der in der Aufgabe genannte Wirkstoff-Code (F.1101) aufgeführt ist. Der Buchstabe, den Sie an **Schnittpunkt von Zeile und Spalte** vorfinden – bei Aufgabe A1 ein B –, bezeichnet die gesuchte Verträglichkeitsgruppe und ist damit die zutreffende Antwort.

| Wirkstoff-Code | Hersteller-Code |
|----------------|-----------------|
| ↓              | ... QD011 ...   |
| .              |                 |
| .              |                 |
| .              |                 |
| F.1101         | → B             |
| .              |                 |
| .              |                 |

Arbeiten Sie so zügig, aber auch so genau wie möglich! **Ihre Punktzahl ergibt sich aus der Anzahl der richtigen Antworten abzüglich der falschen.**  
Nicht bearbeitete Aufgaben bleiben dabei unberücksichtigt.
