# Supplementary material for: Eignung und Zulassung von Bewerber_innen auf ein Hochschulstudium
Source: Atypon-hosted journal article supplement (doi:10.1026/0012-1924/a000266), 2021-04-01

## ESM 7. Zusammenhang von HZB-Note und Punktzahlen des Auswahlverfahrens

Ergänzend zu Abbildung 1 (Streu-Punkte-Diagramm zum Zusammenhang von HZB-Note und Gesamtpunktzahl am Ende von Schritt 3) die alternative Darstellung des Zusammenhangs der durch die HZB-Note erzielten Punktzahl sowie der bis zum Ende von Schritt 3 des Verfahrens zusätzlich erreichten Punktzahlen für den Studierfähigkeitstest, den Mathematiktest sowie die Auswahlgespräche.

**Diagramm 1 (alle Bewerber\*innen)**

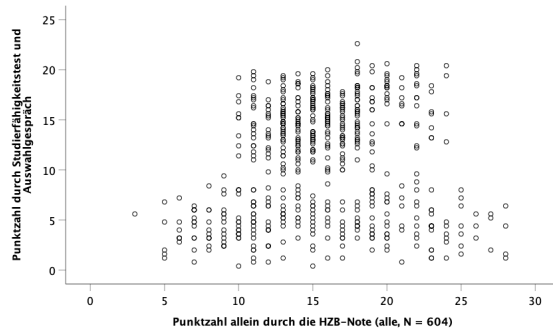

**Diagramm 2 (nur Mathematik)**

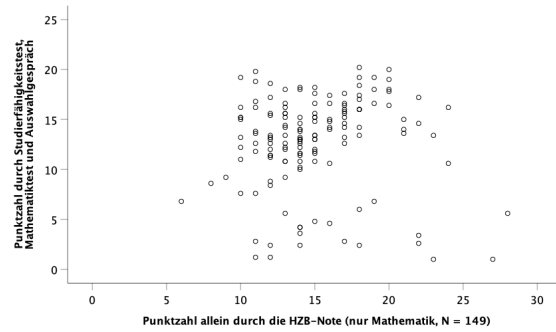

Supplement: 0012-1924_a000266_esm7.pdf [file 0012-1924_a000266_esm7.pdf]
