# Supplementary material for: Eignung und Zulassung von Bewerber_innen auf ein Hochschulstudium
Source: Atypon-hosted journal article supplement (doi:10.1026/0012-1924/a000266), 2021-04-01
Supplement: 0012-1924_a000266_esm8.pdf [file 0012-1924_a000266_esm8.pdf]

## ESM 8. Modellrechnungen zu prädiktiver und inkrementeller Validität des Auswahlverfahrens

Ergänzend zur im Ergebnisteil berichteten prädiktiven und inkrementellen Validität der Punktzahl im Auswahlverfahren (mit Blick auf die Vorhersage von Studienleistung in der Pädagogische Psychologie und in der Mathematik) werden hier die Ergebnisse von zwei Regressionsanalysen berichtet.

Bezüglich der Vorhersage der Studienleistung in der Pädagogischen Psychologie zeigt sich, dass die Punktzahl im Auswahlverfahren (Modell 1.1) und die HZB-Note (Modell 1.2) jeweils statistisch signifikante Einzelprädiktoren sind. Betrachtet man im Modell 1.3 die spezifischen Vorhersagebeiträge der vier Merkmale, die im Auswahlverfahren einbezogen werden, so lassen sich für HZB-Note sowie die Ergebnisse im allgemeinen Studierfähigkeitstest und im Auswahlgespräch statistisch bedeutsame Vorhersagebeiträge feststellen. Der größte Anteil der Varianz wird dabei durch Modell 1.1 bzw. Modell 1.3 erklärt.

Die Regressionsanalysen zur Vorhersage der Studienleistung in Mathematik zeigen ebenfalls statistisch bedeutsame spezifischen Regressionskoeffizienten für das Auswahlverfahren (Modelle 2.1) und für die HZB-Note (Modell 2.2). Im Modell 2.3, das alle vier Variablen des Auswahlverfahrens gleichzeitig betrachtet, lässt sich hingegen kein spezifischer Vorhersagenbeitrag statistisch absichern. Hierfür ist offenbar die vorhandene Stichprobengröße (im Verhältnis zur Anzahl unabhängiger Variablen) nicht ausreichend ( $N = 48$ ). Die Modelle 2.1 und 2.2 sind bzgl. der prädiktiven Vorhersagekraft identisch, was auf Grund der spezifisch fachlichen Studienleistung sowie des geringen Anteils der Punktzahl des Mathematiktests an der Gesamtpunktzahl in Modell 2.1 unmittelbar verständlich ist.

Insgesamt gilt somit: Bzgl. der Vorhersagekraft ist das Gesamtverfahren mindestens gleichwertig zur alleinigen Betrachtung der HZB-Note und inhaltlich (sowie zwingend rechtlich) eben dieser vorzuziehen. Der fachunabhängige Teil des Gesamtverfahrens klärt hierüber hinaus sogar mehr Varianz als die HZB-Note auf und ist auch aus empirischer Sicht eben dieser „überlegen“, die inkrementelle Validität beträgt  $\Delta R^2 = 0.043$  (beim Vergleich von Modell 1.1 und 1.2) und entspricht bekannten Verfahrenseffekten aus Metastudien zu Studierendenauswahl und Studienerfolg (siehe Artikel).

### Regressionsanalysen Modell 1 (abhängige Variable: Studienleistung in Pädagogische Psychologie)

|                                                                | Modell 1.1                          | Modell 1.2                          | Modell 1.3                          |
|----------------------------------------------------------------|-------------------------------------|-------------------------------------|-------------------------------------|
|                                                                | unstandardisiert/<br>standardisiert | unstandardisiert/<br>standardisiert | unstandardisiert/<br>standardisiert |
| Punktzahl <i>Auswahlverfahren</i>                              | .110** / .393**                     | --                                  | ---                                 |
| Punktzahl <i>HZB-Note</i>                                      | --                                  | .126** / .334**                     | ---                                 |
| Punktzahl <i>HZB-Note<sup>a</sup></i>                          | --                                  | --                                  | .121** / .324**                     |
| Punktzahl <i>Außerschulisches Engagement<sup>a</sup></i>       | --                                  | --                                  | .067 / .071                         |
| Punktzahl <i>Allgemeiner Studierfähigkeitstest<sup>a</sup></i> | --                                  | --                                  | .147** / .204**                     |
| Punktzahl <i>Auswahlgespräch<sup>a</sup></i>                   | --                                  | --                                  | .094* / .152*                       |
| Korrigiertes R-Quadrat                                         | <b>.149</b>                         | <b>.106</b>                         | <b>.159</b>                         |
| F-Statistik                                                    | F(1,153) = 27.95;<br>p = .00        | F(1,153) = 19.20<br>p = .00         | F(4,147) = 8.14<br>p = .00          |

<sup>a</sup>: Entsprechend des Vorgehens im Auswahlverfahren gewichtet; siehe Manuskript (Tabelle 1)

\*: Signifikant von 0 verschieden mit  $p < .05$ ; \*\*: Signifikant von 0 verschieden mit  $p < .01$

### Regressionsanalysen Modell 2 (abhängige Variable: Studienleistung in Mathematik)

|                                                                | Modell 2.1                           | Modell 2.2                          | Modell 2.3                          |
|----------------------------------------------------------------|--------------------------------------|-------------------------------------|-------------------------------------|
|                                                                | unstandardisiert/<br>standardisierte | unstandardisiert/<br>standardisiert | unstandardisiert/<br>standardisiert |
| Punktzahl <i>Auswahlverfahren</i>                              | .088* / .328*                        | --                                  | ---                                 |
| Punktzahl <i>HZB-Note</i>                                      | --                                   | .122* / .325*                       | ---                                 |
| Punktzahl <i>HZB-Note<sup>a</sup></i>                          | --                                   | --                                  | .119 / .276                         |
| Punktzahl <i>Außerschulisches Engagement<sup>a</sup></i>       | --                                   | --                                  | .090 / .081                         |
| Punktzahl <i>Allgemeiner Studierfähigkeitstest<sup>a</sup></i> | --                                   | --                                  | -.196 / -.131                       |
| Punktzahl <i>Mathematiktest</i>                                | --                                   | --                                  | .314 / .283                         |
| Punktzahl <i>Auswahlgespräch<sup>a</sup></i>                   | --                                   | --                                  | .020 / .030                         |
| Korrigiertes R-Quadrat                                         | <b>.091</b>                          | <b>.090</b>                         | <b>.005</b>                         |
| F-Statistik                                                    | F(1,55) = 6.62;<br>p = .01           | F(1,55) = 6.51<br>p = .01           | F(5,42) = 1.05<br>p = .40           |

<sup>a</sup>: Entsprechend des Vorgehens im Auswahlverfahren gewichtet; siehe Manuskript (Tabelle 1)

\*: Signifikant von 0 verschieden mit  $p < .05$ ; \*\*: Signifikant von 0 verschieden mit  $p < .01$
