# Supplementary material for: Eignung und Zulassung von Bewerber_innen auf ein Hochschulstudium
Source: Atypon-hosted journal article supplement (doi:10.1026/0012-1924/a000266), 2021-04-01
Supplement: 0012-1924_a000266_esm9.pdf [file 0012-1924_a000266_esm9.pdf]

## ESM 9. Unterschiedliche Gewichtung der Auswahlinstrumente (alle Bewerber\*innen)

Die **Rangreihung** der Bewerber\*innen am Ende von Schritt 3 hängt offensichtlich von der Gewichtung der Auswahlinstrumente ab. In den unten gegebenen **Streu-Punkte-Diagrammen** für alle Bewerber\*innen, die an Schritt 3 des Verfahrens teilgenommen haben, wird dies ersichtlich. Diesen liegen dabei folgende Gewichtungen zu Grunde:

- Diagramm 1: Gesamtpunktzahl = Punktzahl *HZB-Note*  
+ Punktzahl *Außerschulisches Engagement*  
+ **0.1** x Punktzahl *Allgemeiner Studierfähigkeitstest*  
+ **0.9** x Punktzahl *Auswahlgespräch*
- Diagramm 2: Gesamtpunktzahl = Punktzahl *HZB-Note*  
+ Punktzahl *Außerschulisches Engagement*  
+ **0.2** x Punktzahl *Allgemeiner Studierfähigkeitstest*  
+ **0.8** x Punktzahl *Auswahlgespräch*
- Diagramm 3: Gesamtpunktzahl = Punktzahl *HZB-Note*  
+ Punktzahl *Außerschulisches Engagement*  
+ **0.3** x Punktzahl *Allgemeiner Studierfähigkeitstest*  
+ **0.7** x Punktzahl *Auswahlgespräch*
- ...
- Diagramm 9: Gesamtpunktzahl = Punktzahl *HZB-Note*  
+ Punktzahl *Außerschulisches Engagement*  
+ **0.9** x Punktzahl *Allgemeiner Studierfähigkeitstest*  
+ **0.1** x Punktzahl *Auswahlgespräch*

Die gestrichelten, vertikalen Linien geben als Referenzen die für die Zulassung zu den Hauptfächern **notwendigen Punktzahlen** für das Wintersemester 2017/ 2018 an: x = 20 Punkte für GHR-Lehramt, Fach Englisch; x = 23 Punkte für GHR-Lehramt, Fach Mathematik; x = 30 Punkte für GHR-Lehramt, Fach Deutsch. Außerdem Angabe des **Rangkorrelationskoeffizienten** zwischen *Punktzahl allein durch HZB-Note* und *Gesamtpunktzahl nach Schritt 3*.

Diagramm 1 (rho = .51\*\*)

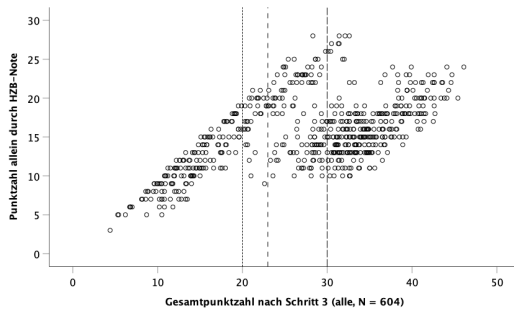

Diagramm 2 (rho = .55\*\*)

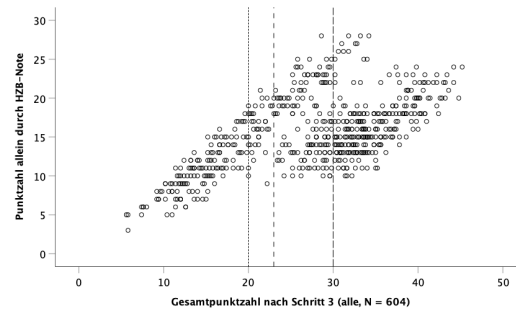

Diagramm 3 (rho = .59\*\*)

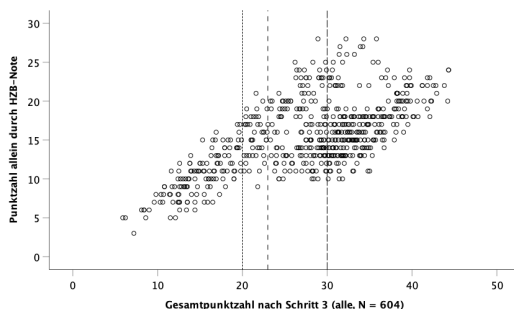

Diagramm 4 (rho = .65\*\*)

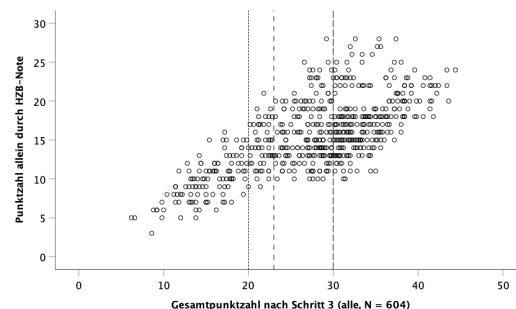

Diagramm 5 (rho = .70\*\*)

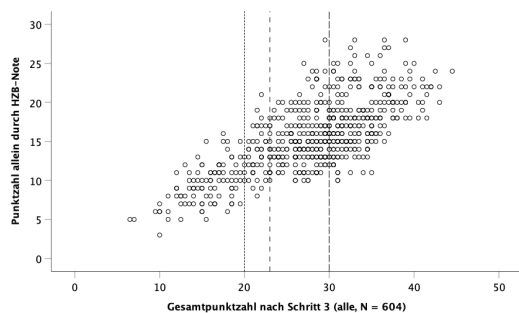

Diagramm 6 (rho = .74\*\*)

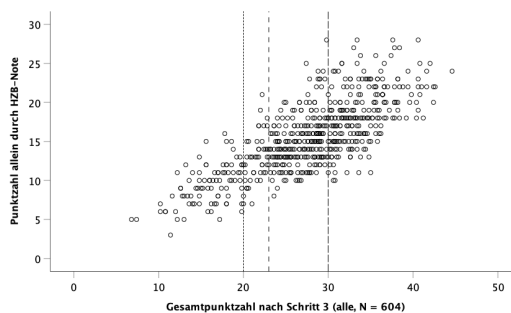

Diagramm 7 (rho = .76\*\*)

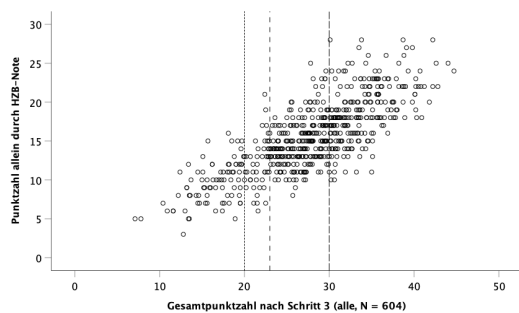

Diagramm 8 (rho = .76\*\*)

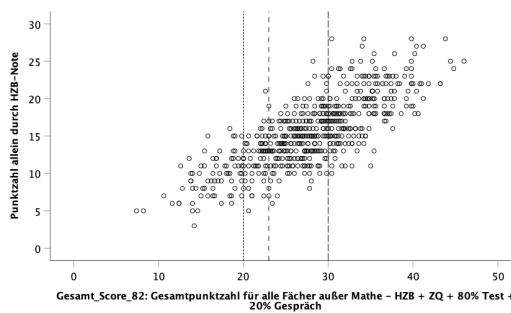

Diagramm 9 (rho = .73\*\*)

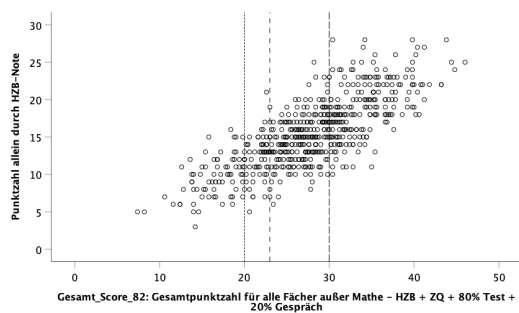

\*: Die Korrelation ist auf dem Niveau 0.05 (2-seitig) signifikant.

\*\* : Die Korrelation ist auf dem Niveau 0.01 (2-seitig) signifikant.
