# Supplementary material for: Eignung und Zulassung von Bewerber_innen auf ein Hochschulstudium
Source: Atypon-hosted journal article supplement (doi:10.1026/0012-1924/a000266), 2021-04-01
Supplement: 0012-1924_a000266_esm10.pdf [file 0012-1924_a000266_esm10.pdf]

## ESM 10. Unterschiedlicher Gewichtung der Auswahlinstrumente (nur Mathematik)

Die **Rangreihung** der Bewerber\*innen am Ende von Schritt 3 hängt offensichtlich von der Gewichtung der Auswahlinstrumente ab. In den unten gegebenen **Streu-Punkte-Diagrammen** für Bewerber\*innen mit Fach Mathematik, die an Schritt 3 des Verfahrens teilgenommen haben, wird dies ersichtlich. Diesen liegen dabei folgende Gewichtungen zu Grunde:

- Diagramm 1: Gesamtpunktzahl = Punktzahl *HZB-Note*  
+ Punktzahl *Außerschulisches Engagement*  
+ **0.05** x Punktzahl *Allgemeiner Studierfähigkeitstest*  
+ **0.05** x Punktzahl *Mathematiktest*  
+ **0.9** x Punktzahl *Auswahlgespräch*
- Diagramm 2: Gesamtpunktzahl = Punktzahl *HZB-Note*  
+ Punktzahl *Außerschulisches Engagement*  
+ **0.1** x Punktzahl *Allgemeiner Studierfähigkeitstest*  
+ **0.1** x Punktzahl *Mathematiktest*  
+ **0.8** x Punktzahl *Auswahlgespräch*
- Diagramm 3: Gesamtpunktzahl = Punktzahl *HZB-Note*  
+ Punktzahl *Außerschulisches Engagement*  
+ **0.15** x Punktzahl *Allgemeiner Studierfähigkeitstest*  
+ **0.15** x Punktzahl *Mathematiktest*  
+ **0.7** x Punktzahl *Auswahlgespräch*
- ...
- Diagramm 9: Gesamtpunktzahl = Punktzahl *HZB-Note*  
+ Punktzahl *Außerschulisches Engagement*  
+ **0.45** x Punktzahl *Allgemeiner Studierfähigkeitstest*  
+ **0.45** x Punktzahl *Mathematiktest*  
+ **0.1** x Punktzahl *Auswahlgespräch*

Die gestrichelten, vertikalen Linie gibt als Referenz die für die Zulassung **notwendige Punktzahl** für das Wintersemester 2017/ 2018 für das Fach Mathematik (GHR-Lehramts) an. Außerdem Angabe des **Rangkorrelationskoeffizienten** zwischen *Punktzahl allein durch HZB-Note* und *Gesamtpunktzahl nach Schritt 3*.

**Diagramm 1 (rho = .57\*\*)**

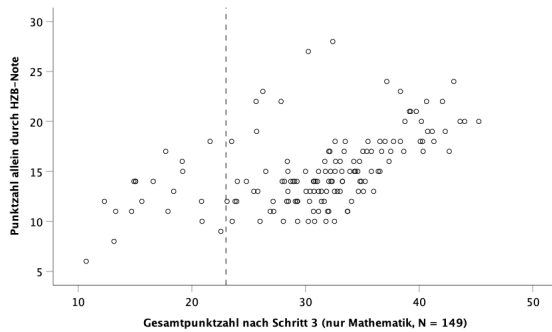

**Diagramm 2 (rho = .60\*\*)**

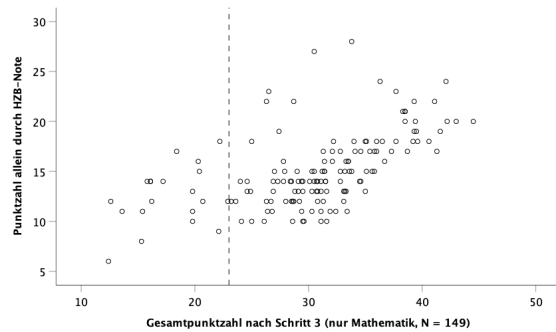

**Diagramm 3 (rho = .63\*\*)**

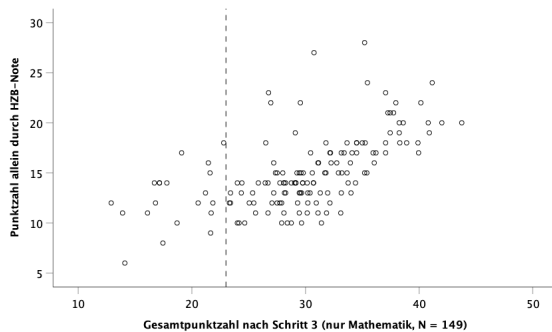

**Diagramm 4 (rho = .66\*\*)**

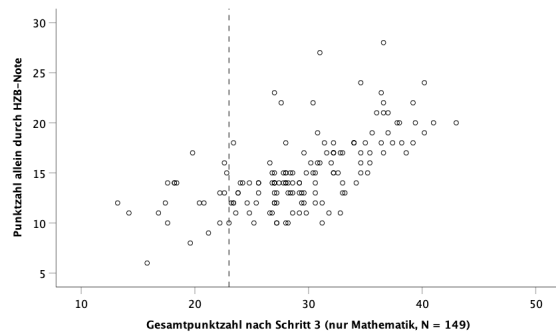

Diagramm 5 (rho = .68\*\*)

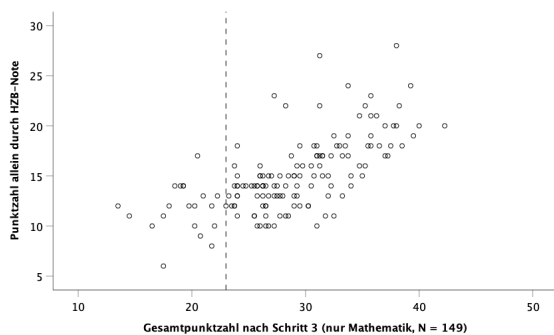

Diagramm 6 (rho = .68\*\*)

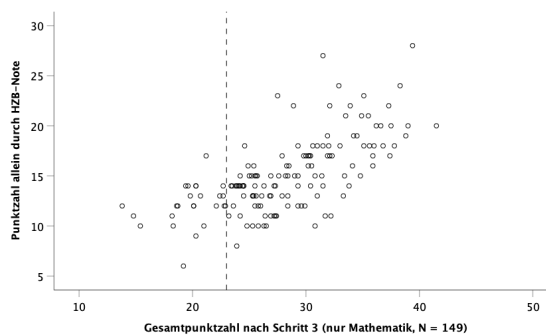

Diagramm 7 (rho = .67\*\*)

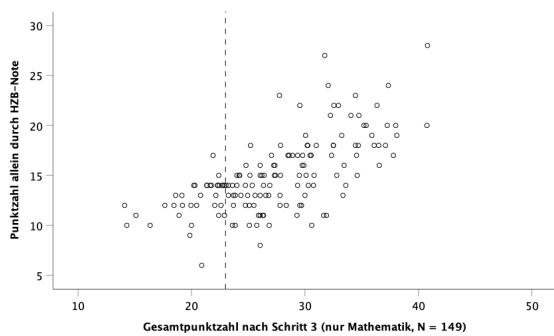

Diagramm 8 (rho = .64\*\*)

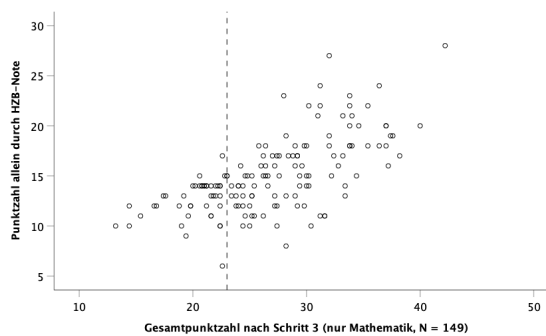

Diagramm 9 (rho = .61\*\*)

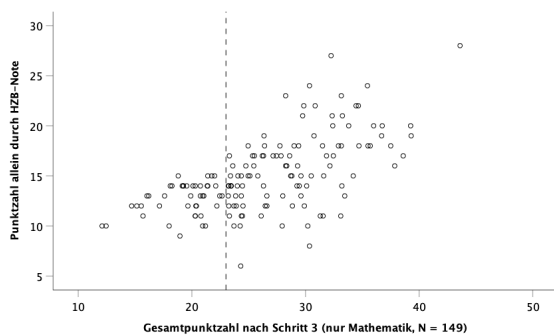

\*: Die Korrelation ist auf dem Niveau 0.05 (2-seitig) signifikant.

\*\* : Die Korrelation ist auf dem Niveau 0.01 (2-seitig) signifikant.
